# Supplementary material for: Fragile magnetic ordering between robust 2D-ferrimagnets in the AFe3(SeO3)2F6 (A = K, Rb, Cs) series
Source: Royal Society of Chemistry journal article supplement (doi:10.1039/d1tc05650f), 2022-01-01
Supplement: d1tc05650f1.pdf [file d1tc05650f1.pdf]

Supporting Information for:

## **Fragile magnetic ordering between robust 2D-ferrimagnets in the $AFe_3(SeO_3)_2F_6$ (A=K, Rb, Cs) series**

Haoming Yang,<sup>a</sup> Olivier Mentré,<sup>b,\*</sup> Tianyu Zhu,<sup>a</sup> Claire Minaud,<sup>b</sup> Clemens Ritter,<sup>c</sup> Xinan Zhang,<sup>a</sup> Yong Jin,<sup>a</sup> and Minfeng Lü,<sup>a,\*</sup>

<sup>a</sup>*School of Environmental & Chemical Engineering, Jiangsu University of Science and Technology, Zhenjiang 212003, Jiangsu, People's Republic of China*

<sup>b</sup>*Université Lille Nord de France, UMR 8181 CNRS, Unité de Catalyse et de Chimie du Solide (UCCS USTL), F-59655 Villeneuve d'Ascq, France.*

<sup>c</sup>*Institut Laue-Langevin, Avenue des Martyrs 71, Grenoble Cedex, France*

*\*To whom correspondence should be addressed*

*E-mail address: m.f.lv@hotmail.com (Minfeng Lü)*

*olivier.mentre@univ-lille.fr (Olivier Mentré)*

Figure S1. Calculated and observed powder X-ray diffraction patterns for  $KFe_3(SeO_3)_2F_6$ .

Figure S2. Calculated and observed powder X-ray diffraction patterns for  $RbFe_3(SeO_3)_2F_6$ .

Figure S3. The corresponding EDX spectra for  $KFe_3(SeO_3)_2F_6$ .

Figure S4. The corresponding EDX spectra for  $RbFe_3(SeO_3)_2F_6$ .

Figure S5. Infrared spectra of  $AFe_3(SeO_3)_2F_6$  (A=K, and Rb).

Figure S6. TGA diagram for  $KFe_3(SeO_3)_2F_6$ .

Figure S7. TGA diagram for  $RbFe_3(SeO_3)_2F_6$ .

Figure S8. the three configurations and their energy used by DFT +U with polarized spins (white and black Fe atoms represent up and down spins).  $n=5$  electron per site for  $Fe^{3+}$ ,  $E_0$  is the energy of the system besides magnetic perturbations.

Figure S9. 2D  $[Fe_3(SeO_3)_2F_6]^-$  block along different axis, where Fe-F-F-Fe super-exchange paths (a) and Fe-F-F-Fe dihedral angles (b) are highlighted respectively.

Figure S10. Field dependence of Magnetization for  $KFe_3(SeO_3)_2F_6$  between 280K and 400K.

Figure S11.  $M(H)$  and  $dM/dH$  curves at different low Field for  $AFe_3(SeO_3)_2F_6$  (A=K(a,b,c), Rb (d,e,f))

Figure S12. (a) The temperature dependence of  $C_p/T$  under 0 Oe in  $AFe_3(SeO_3)_2F_6$  ( $A=K,Rb$ ), (b) The temperature dependence of  $C_p$  under 10 Oe in  $AFe_3(SeO_3)_2F_6$  ( $A=K,Rb$ ).

Figure S13. (a) The isothermal initial magnetization around  $T_c$  for  $RbFe_3F_6(SeO_3)_2$ , (b) the Arrott plot of  $M^2$  vs.  $H/M$ .

Figure S14. The isotherms of  $M^{1/\beta}$  vs.  $(H/M)^{1/\gamma}$  with parameters of (a)3D-XY model, (b) 3D-Heisenberg model, (c)3D-tricritical mean field model, (d) 3D-Ising model.

Table S1. Fractional atomic coordinates and isotropic or equivalent isotropic displacement parameters of  $KFe_3(SeO_3)_2F_6$ .

Table S2. Harmonic displacement parameters obtained for the compound  $KFe_3(SeO_3)_2F_6$ .

Table S3. Bond lengths ( $\text{\AA}$ ) and Band angles (degrees) of  $KFe_3(SeO_3)_2F_6$ .

Table S4. Fractional atomic coordinates and isotropic or equivalent isotropic displacement parameters of  $RbFe_3(SeO_3)_2F_6$ .

Table S5. Harmonic displacement parameters obtained for the compound  $RbFe_3(SeO_3)_2F_6$ .

Table S6. Bond lengths ( $\text{\AA}$ ) and Band angles (degrees) of  $RbFe_3(SeO_3)_2F_6$ .

Table S7. BVS of  $AFe_3(SeO_3)_2F_6$  ( $A=K$ , and  $Rb$ ).

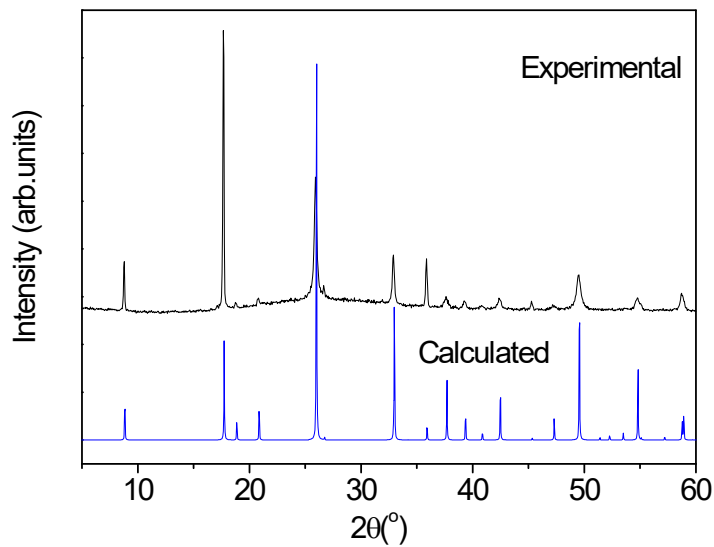

Figure S1. Calculated and observed powder X-ray diffraction patterns for  $KFe_3(SeO_3)_2F_6$ .

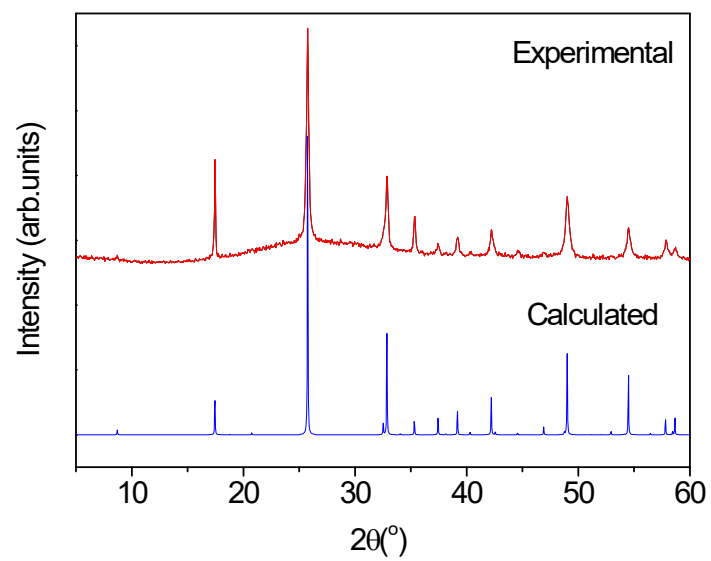

Figure S2. Calculated and observed powder X-ray diffraction patterns for  $\text{RbFe}_3(\text{SeO}_3)_2\text{F}_6$ .

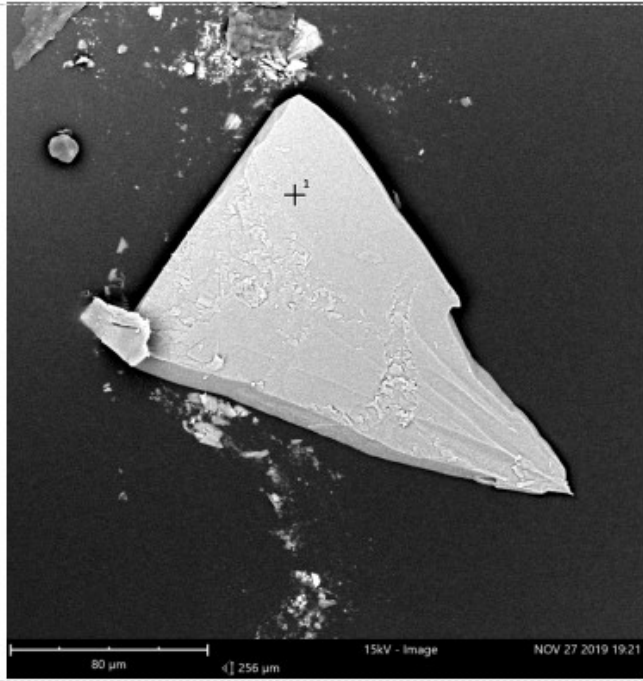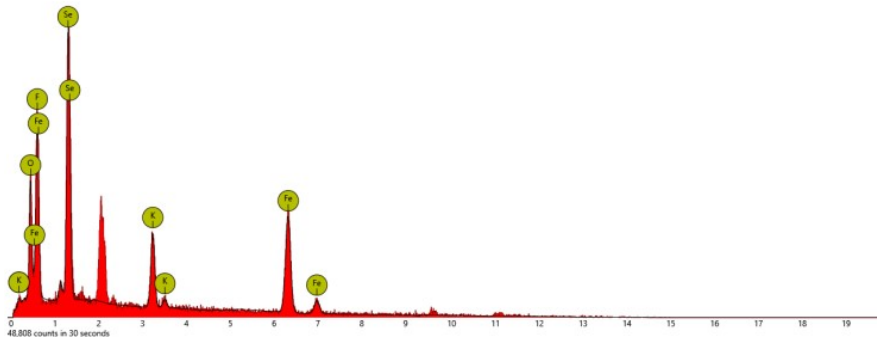

Figure S3. The corresponding EDX spectra for  $\text{KFe}_3(\text{SeO}_3)_2\text{F}_6$ .

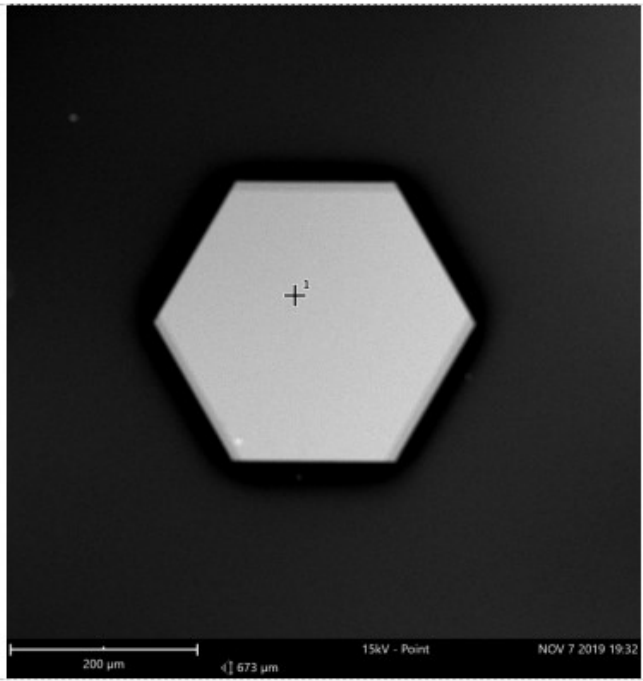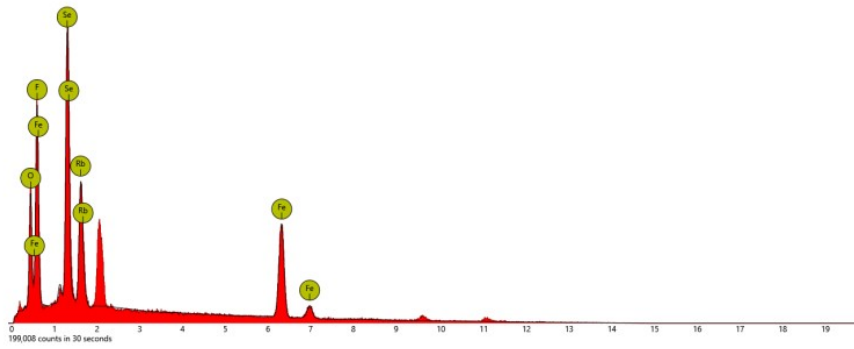

Figure S4. The corresponding EDX spectra for  $\text{RbFe}_3(\text{SeO}_3)_2\text{F}_6$ .

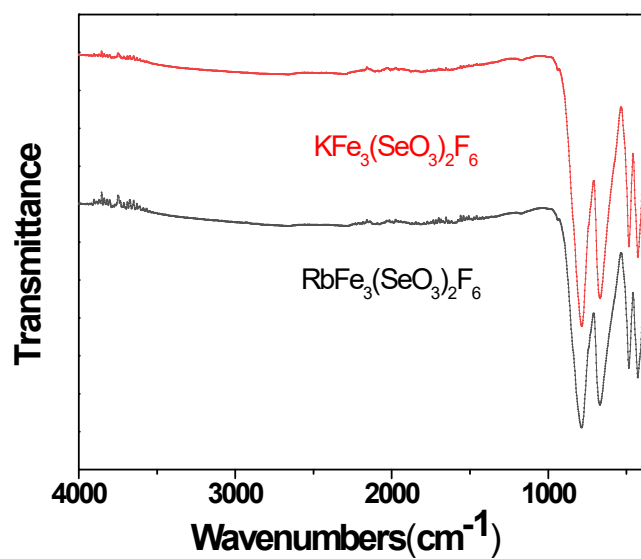

Figure S5. Infrared spectra of  $\text{AFe}_3(\text{SeO}_3)_2\text{F}_6$  (A=K, and Rb).

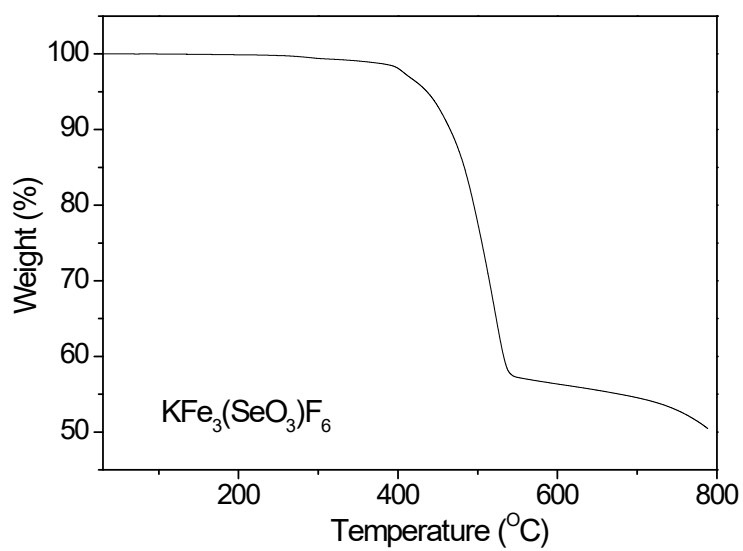

Figure S6. TGA diagram for  $\text{KFe}_3(\text{SeO}_3)_2\text{F}_6$ .

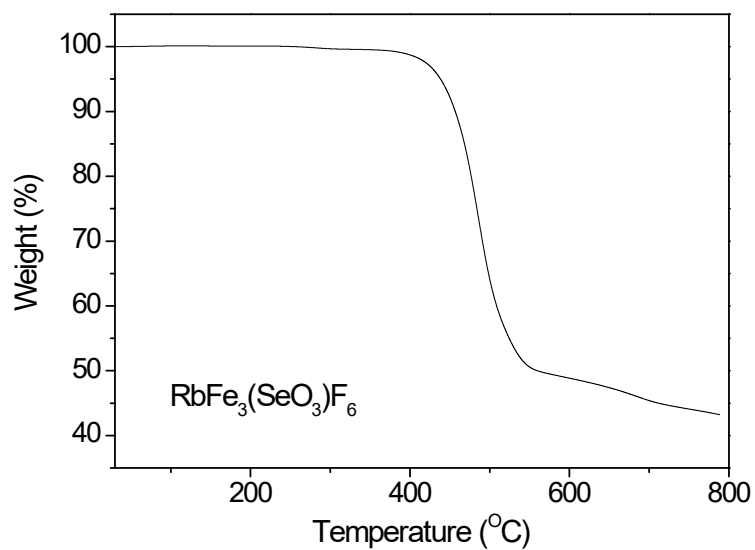

Figure S7. TGA diagram for  $\text{RbFe}_3(\text{SeO}_3)_2\text{F}_6$ .

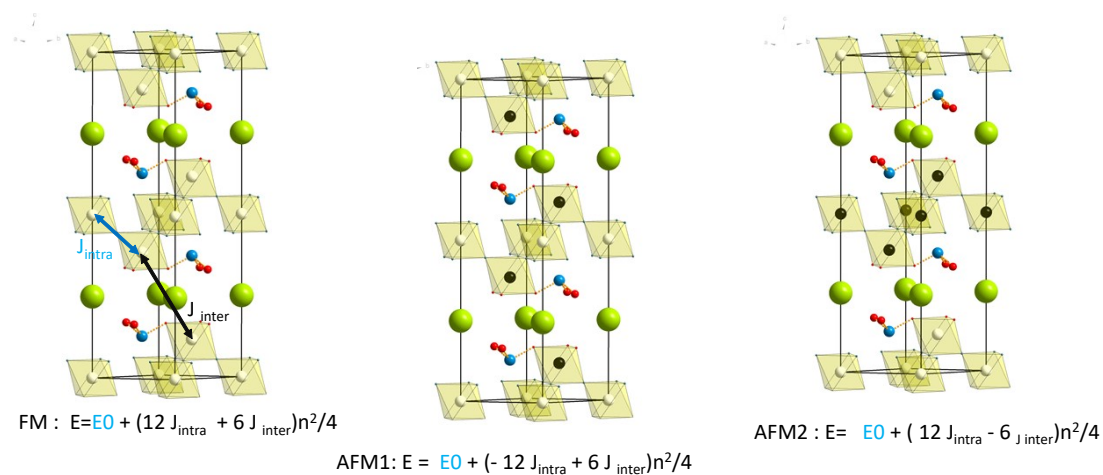

Figure S8. the three configurations and their energy used by DFT +U with polarized spins (white and black Fe atoms represent up and down spins).  $n=5$  electron per site for  $\text{Fe}^{3+}$ ,  $E_0$  is the energy of the system besides magnetic perturbations.

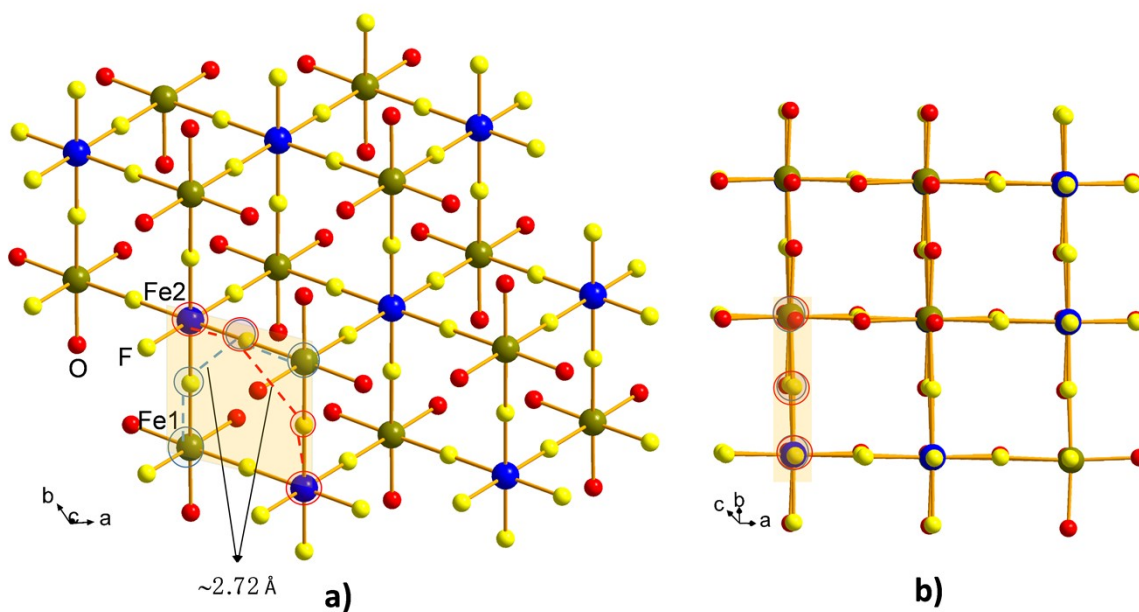

Figure S9. 2D  $[\text{Fe}_3(\text{SeO}_3)_2\text{F}_6]^-$  block along different axis, where Fe-F-F-Fe super-exchange paths (a) and Fe-F-F-Fe dihedral angles (b) are highlighted respectively.

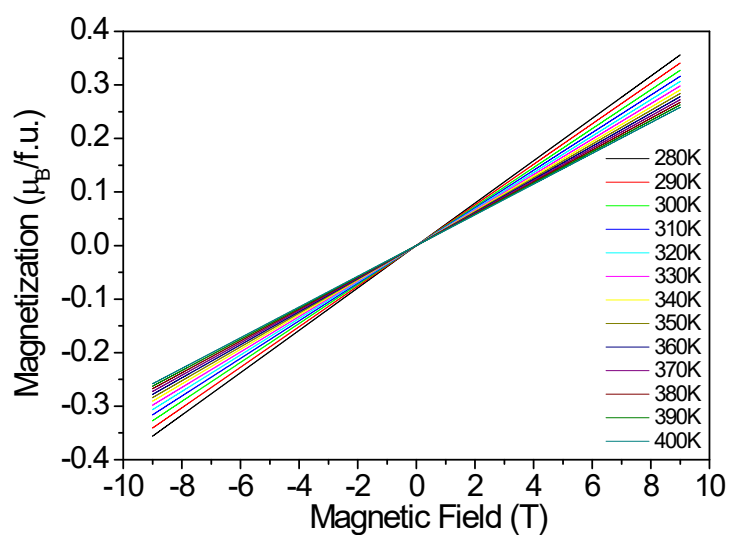

Figure S10. Field dependence of Magnetization for  $\text{KFe}_3(\text{SeO}_3)_2\text{F}_6$  between 280K and 400K.



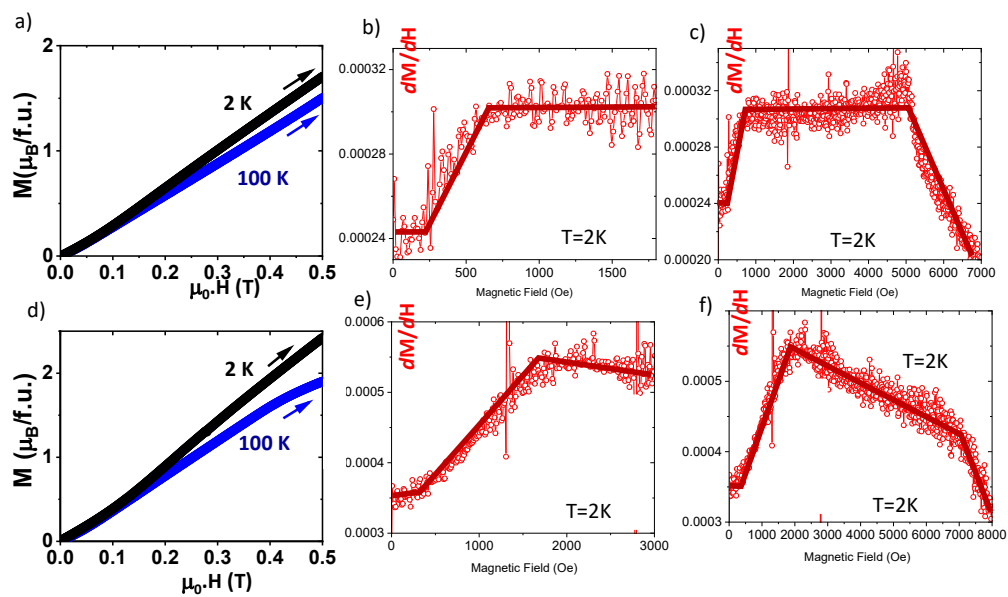

Figure S11.  $M(H)$  and  $dM/dH$  curves at different low Field for  $A\text{Fe}_3(\text{SeO}_3)_2\text{F}_6$  (A=K(a,b,c), Rb (d,e,f))

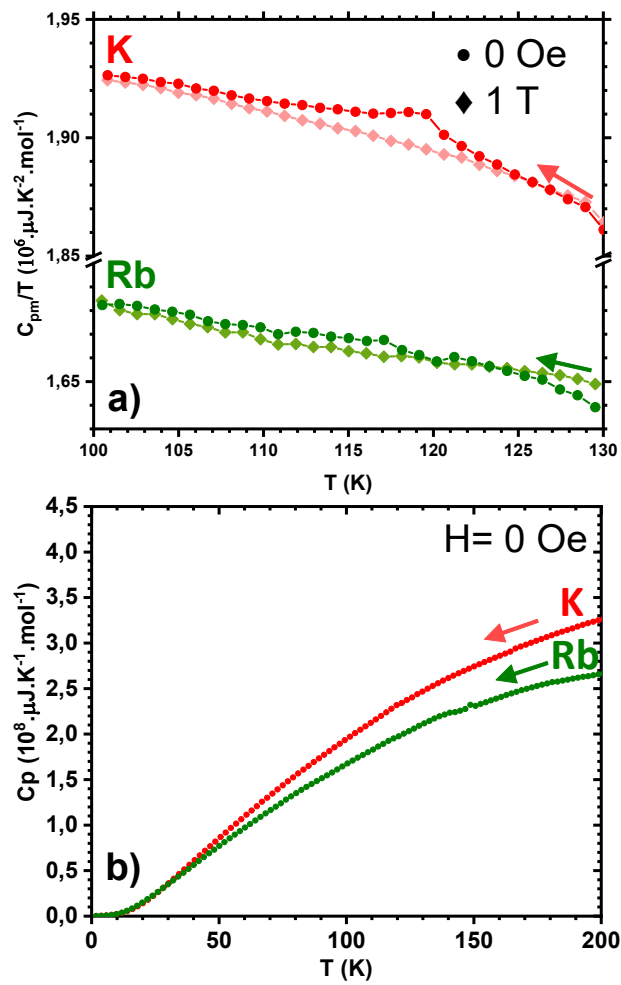

Figure S12. (a) The temperature dependence of  $C_p/T$  under 0 Oe and 1T in  $AFe_3(SeO_3)_2F_6$  ( $A = K, Rb$ ), (b) The temperature dependence of  $C_p$  under 0 Oe in  $AFe_3(SeO_3)_2F_6$  ( $A = K, Rb$ ).

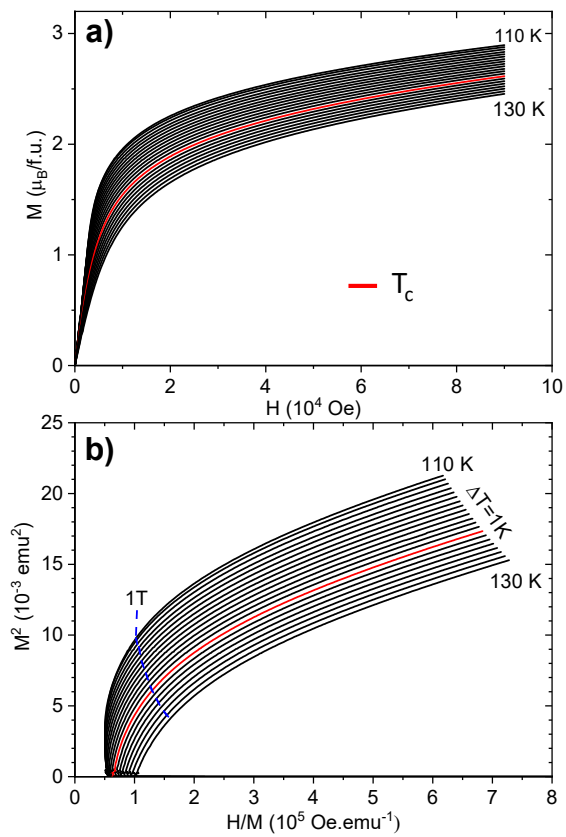

Figure S13 (a) The isothermal initial magnetization around  $T_c$  for  $\text{RbFe}_3\text{F}_6(\text{SeO}_3)_2$ , (b) the Arrott plot of  $M^2$  vs.  $H/M$ .

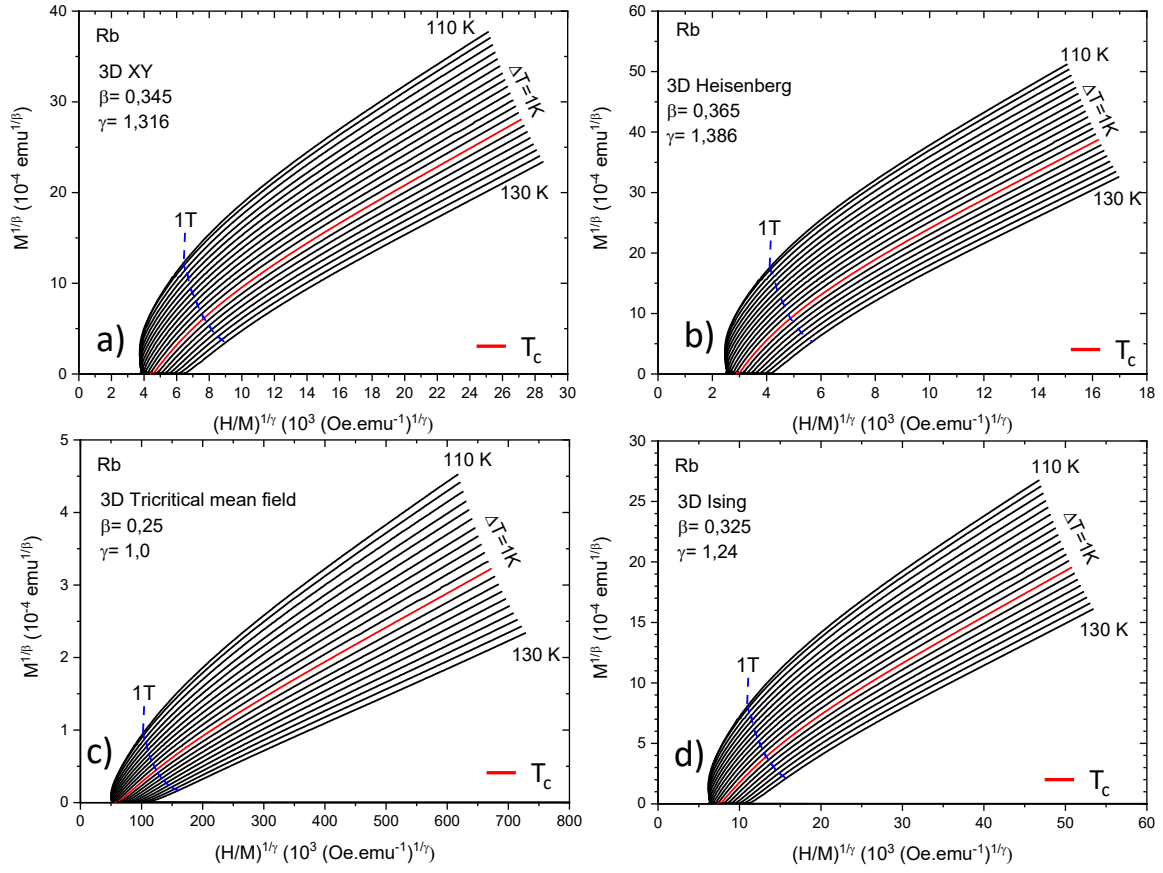

Figure S14 The isotherms of  $M^{1/\beta}$  vs.  $(H/M)^{1/\gamma}$  with parameters of (a)3D-XY model, (b) 3D-Heisenberg model, (c)3D-tricritical mean field model, (d) 3D-Ising model.

**Table S1:** Fractional atomic coordinates and isotropic or equivalent isotropic displacement parameters of  $\text{KFe}_3(\text{SeO}_3)_2\text{F}_6$ .

|     | Wyck. | x         | y         | z           | Uiso*/Ueq  | Occ.<1) |
|-----|-------|-----------|-----------|-------------|------------|---------|
| K1  | 1b    | 0         | 0         | 0.5         | 0.0360(12) | 1       |
| Fe1 | 2d    | 0.3333    | 0.6667    | 0.23621(13) | 0.0075(4)  | 1       |
| Fe2 | 1a    | 0         | 0         | 0           | 0.0052(5)  | 1       |
| Se1 | 2d    | 0.6667    | 0.3333    | 0.25824(9)  | 0.0083(3)  | 1       |
| F1  | 6i    | 0.1663(3) | 0.3327(7) | 0.1113(3)   | 0.0190(8)  | 1       |
| O1  | 6i    | 0.5077(5) | 0.4923(5) | 0.3387(4)   | 0.0182(9)  | 1       |

**Table S2.** Harmonic displacement parameters obtained for the compound  $\text{KFe}_3(\text{SeO}_3)_2\text{F}_6$ .

|     | $U_{11}$   | $U_{22}$   | $U_{33}$  | $U_{12}$    | $U_{13}$ | $U_{23}$ |
|-----|------------|------------|-----------|-------------|----------|----------|
| K1  | 0.0418(15) | 0.0418(15) | 0.025(2)  | 0.0209(8)   | 0        | 0        |
| Fe1 | 0.0067(5)  | 0.0067(5)  | 0.0093(7) | 0.0033(2)   | 0        | 0        |
| Fe2 | 0.0052(6)  | 0.0052(6)  | 0.0053(9) | 0.0026(3)   | 0        | 0        |
| Se1 | 0.0080(4)  | 0.0080(4)  | 0.0091(5) | 0.00398(18) | 0        | 0        |

**Table S3.** Bond lengths (Å) and Band angles (degrees) of  $\text{KFe}_3(\text{SeO}_3)_2\text{F}_6$ .

| Atom1 | Atom2 | distances | Band angles | degrees    |
|-------|-------|-----------|-------------|------------|
| K1    | O1×12 | 3.156(3)  | F1-Fe1-F1×3 | 85.35(12)  |
| Fe1   | F1×3  | 2.005(3)  | F1-Fe1-O1×6 | 89.89(14)  |
|       | O1×3  | 1.933(3)  | F1-Fe1-O1×3 | 173.52(16) |
| Fe2   | F1×6  | 1.919(3)  | O1-Fe1-O1×3 | 94.50(15)  |
| Se1   | O1×3  | 1.697(3)  | F1-Fe2-F1×6 | 89.76(12)  |
|       |       |           | F1-Fe2-F1×6 | 90.24(10)  |
|       |       |           | F1-Fe2-F1×3 | 180.0(5)   |
|       |       |           | O1-Se1-O1×3 | 99.37(16)  |
|       |       |           | Fe1-F1-Fe2  | 176.95(19) |

**Table S4:** Fractional atomic coordinates and isotropic or equivalent isotropic displacement parameters of  $\text{RbFe}_3(\text{SeO}_3)_2\text{F}_6$ .

|     | Wyck. | x         | y         | z           | Uiso*/Ueq | Occ.( $<1$ ) |
|-----|-------|-----------|-----------|-------------|-----------|--------------|
| Rb1 | 1a    | 0         | 0         | 0.5         | 0.0236(5) | 1            |
| Fe1 | 2d    | 0.3333    | 0.6667    | 0.23188(11) | 0.0082(4) | 1            |
| Fe2 | 1b    | 0         | 0         | 0           | 0.0070(5) | 1            |
| Se1 | 2d    | 0.6667    | 0.3333    | 0.25402(8)  | 0.0099(3) | 1            |
| F1  | 6i    | 0.1664(4) | 0.3329(7) | 0.1088(3)   | 0.0183(8) | 1            |
| O1  | 6i    | 0.5074(5) | 0.4926(5) | 0.3329(3)   | 0.0130(9) | 1            |

**Table S5.** Harmonic displacement parameters obtained for the compound  $\text{RbFe}_3(\text{SeO}_3)_2\text{F}_6$ .

|     | $U_{11}$  | $U_{22}$  | $U_{33}$  | $U_{12}$    | $U_{13}$ | $U_{23}$ |
|-----|-----------|-----------|-----------|-------------|----------|----------|
| Rb1 | 0.0247(6) | 0.0247(6) | 0.0215(7) | 0.0123(3)   | 0.00000  | 0.00000  |
| Fe1 | 0.0072(5) | 0.0072(5) | 0.0100(7) | 0.0036(2)   | 0.00000  | 0.00000  |
| Fe2 | 0.0069(6) | 0.0069(6) | 0.0069(8) | 0.0034(3)   | 0.00000  | 0.00000  |
| Se1 | 0.0092(4) | 0.0092(4) | 0.0113(5) | 0.00459(18) | 0.00000  | 0.00000  |

**Table S6.** Bond lengths (Å) and Band angles (degrees) of RbFe<sub>3</sub>(SeO<sub>3</sub>)<sub>2</sub>F<sub>6</sub>.

| Atom1 | Atom2 | distances | Band angles | degrees    |
|-------|-------|-----------|-------------|------------|
| Rb1   | O1×12 | 3.210(2)  | F1-Fe1-F1×3 | 85.42(12)  |
| Fe1   | F1×3  | 2.011(3)  | F1-Fe1-O1×6 | 89.85(13)  |
|       | O1×3  | 1.937(3)  | F1-Fe1-O1×3 | 173.56(14) |
| Fe2   | F1×6  | 1.920(3)  | O1-Fe1-O1×3 | 94.52(13)  |
| Se1   | O1×3  | 1.703(3)  | F1-Fe2-F1×6 | 90.18(12)  |
|       |       |           | F1-Fe2-F1×6 | 89.82(9)   |
|       |       |           | F1-Fe2-F1×3 | 180.0(5)   |
|       |       |           | O1-Se1-O1×3 | 99.65(15)  |
|       |       |           | Fe1-F1-Fe2  | 176.69(18) |

**Table S7.** BVS of AFe<sub>3</sub>(SeO<sub>3</sub>)<sub>2</sub>F<sub>6</sub> (A=K, and Rb).

| KFe <sub>3</sub> (SeO <sub>3</sub> ) <sub>2</sub> F <sub>6</sub> |                 |                  |                  | RbFe <sub>3</sub> (SeO <sub>3</sub> ) <sub>2</sub> F <sub>6</sub> |                  |                  |                  |
|------------------------------------------------------------------|-----------------|------------------|------------------|-------------------------------------------------------------------|------------------|------------------|------------------|
| Atom                                                             | V <sub>K*</sub> | V <sub>Fe*</sub> | V <sub>Se*</sub> | Atom                                                              | V <sub>Rb*</sub> | V <sub>Fe*</sub> | V <sub>Se*</sub> |
| K(1)                                                             | 0.753(2)        |                  |                  | Rb(1)                                                             | 0.928(2)         |                  |                  |
| Fe(1)                                                            |                 | 3.12(1)          |                  | Fe(1)                                                             |                  | 3.08(1)          |                  |
| Fe(2)                                                            |                 | 3.14(1)          |                  | Fe(2)                                                             |                  | 3.12(1)          |                  |
| Se(1)                                                            |                 |                  | 4.08(2)          | Se(1)                                                             |                  |                  | 4.02(2)          |
| Atom                                                             | V <sub>F*</sub> | V <sub>O*</sub>  |                  | Atom                                                              | V <sub>F*</sub>  | V <sub>O*</sub>  |                  |
| F(1)                                                             | -0.94(1)        |                  |                  | F(1)                                                              | -0.93(1)         |                  |                  |
| O(1)                                                             |                 | -2.11(1)         |                  | O(1)                                                              |                  | -2.11(2)         |                  |

\* (R, b) parameters being for K<sup>+</sup>-O (2.132, 0.37), K<sup>+</sup>-F (1.992, 0.37), Rb<sup>+</sup>-O (2.263, 0.37), Rb<sup>+</sup>-F (2.16, 0.37), Fe<sup>3+</sup>-O (1.759, 0.37), Fe<sup>3+</sup>-F (1.679, 0.37), and Se<sup>6+</sup>-O (1.788, 0.37)
